# Supplementary material
Source: ML conference proceedings conference paper supplement (https://proceedings.mlr.press/v70/mhammedi17a.html)
Supplement: Supplementary file [file mhammedi17a-supp.pdf]

## A. Proofs

*Sketch of the proof for Theorem 1.* We need to show that for every  $\tilde{Q} \in \mathbf{O}(n)$ , there exists a tuple of vectors  $(\mathbf{u}_1, \dots, \mathbf{u}_n) \in \mathbb{R} \times \dots \times \mathbb{R}^n$  such that  $\tilde{Q} = \mathcal{M}_1(\mathbf{u}_1, \dots, \mathbf{u}_n)$ . Algorithm 1 shows how a QR decomposition can be performed using the matrices  $\{\mathcal{H}_k(\mathbf{u}_k)\}_{k=1}^n$  while ensuring that the upper triangular matrix  $R$  has positive diagonal elements. If we apply this algorithm to an orthogonal matrix  $\tilde{Q}$ , we get a tuple  $(\mathbf{u}_1, \dots, \mathbf{u}_n)$  which satisfies

$$QR = \mathcal{H}_n(\mathbf{u}_n) \dots \mathcal{H}_1(\mathbf{u}_1)R = \tilde{Q}.$$

Note that the matrix  $R$  must be orthogonal since  $R = Q'\tilde{Q}$ . Therefore,  $R = I$ , since the only upper triangular matrix with positive diagonal elements is the identity matrix. Hence, we have

$$\mathcal{M}_1(\mathbf{u}_1, \dots, \mathbf{u}_n) = \mathcal{H}_n(\mathbf{u}_n) \dots \mathcal{H}_1(\mathbf{u}_1) = \tilde{Q}.$$

□

---

**Algorithm 1** QR decomposition using the mappings  $\{\mathcal{H}_k\}$ . For a matrix  $B \in \mathbb{R}^{n \times n}$ ,  $\{B_{k,k}\}_{1 \leq k \leq n}$  denote its diagonal elements, and  $B_{k..n,k} = (B_{k,k}, \dots, B_{n,k})' \in \mathbb{R}^{n-k+1}$ .

**Require:**  $A \in \mathbb{R}^{n \times n}$  is a full-rank matrix.

**Ensure:**  $Q$  and  $R$  where  $Q = \mathcal{H}_n(\mathbf{u}_n) \dots \mathcal{H}_1(\mathbf{u}_1)$  and  $R$  is upper triangular with positive diagonal elements such that  $A = QR$

$R \leftarrow A$

$Q \leftarrow I$  {Initialise Q to the identity matrix}

**for**  $k = 1$  to  $n - 1$  **do**

**if**  $R_{k,k} = \|R_{k..n,k}\|$  **then**

$\mathbf{u}_{n-k+1} = (0, \dots, 0, 1)' \in \mathbb{R}^{n-k+1}$

**else**

$\mathbf{u}_{n-k+1} \leftarrow R_{k..n,k} - \|R_{k..n,k}\| (1, 0, \dots, 0)'$

$\mathbf{u}_{n-k+1} \leftarrow \mathbf{u}_{n-k+1} / \|\mathbf{u}_{n-k+1}\|$

**end if**

$R \leftarrow \mathcal{H}_{n-k+1}(\mathbf{u}_{n-k+1})R$

$Q \leftarrow Q\mathcal{H}_{n-k+1}(\mathbf{u}_{n-k+1})$

**end for**

$\mathbf{u}_1 = \text{sgn}(R_{n,n}) \in \mathbb{R}$

$R \leftarrow \mathcal{H}_1(\mathbf{u}_1)R$

$Q \leftarrow Q\mathcal{H}_1(\mathbf{u}_1)$

---

**Lemma 1.** (Giles, 2008) Let  $A$ ,  $B$ , and  $C$  be real or complex matrices, such that  $C = f(A, B)$  where  $f$  is some differentiable mapping. Let  $\mathcal{L}$  be some scalar quantity which depends on  $C$ . Then we have the following identity

$$\text{Tr}(\bar{C}' dC) = \text{Tr}(\bar{A}' dA) + \text{Tr}(\bar{B}' dB),$$

where  $dA$ ,  $dB$ , and  $dC$  represent infinitesimal perturbations and

$$\bar{C} := \frac{\partial \mathcal{L}}{\partial C}, \quad \bar{A} := \left[ \frac{\partial C}{\partial A} \right]' \frac{\partial \mathcal{L}}{\partial C}, \quad \bar{B} := \left[ \frac{\partial C}{\partial B} \right]' \frac{\partial \mathcal{L}}{\partial C}.$$

*Proof of Theorem 2.* Let  $C = h - UT^{-1}U'h$  where  $(U, h) \in \mathbb{R}^{n \times m} \times \mathbb{R}^n$  and  $T = \text{striu}(U'U) + \frac{1}{2}\text{diag}(U'U)$ . Notice that the matrix  $T$  can be written using the Hadamard product as follows

$$T = B \circ (U'U), \quad (1)$$

where  $B = \text{striu}(J_m) + \frac{1}{2}I_m$  and  $J_m$  is the  $m \times m$  matrix of all ones.

Calculating the infinitesimal perturbations of  $C$  gives

$$\begin{aligned} dC &= (I - UT^{-1}U')dh \\ &\quad - dUT^{-1}U'h - UT^{-1}dU'h \\ &\quad + UT^{-1}dT T^{-1}U'h. \end{aligned}$$

Using Equation (1) we can write

$$dT = B \circ (dU'U + U'dU).$$

By substituting this back into the expression of  $dC$ , multiplying the left and right-hand sides by  $\bar{C}'$ , and applying the trace we get

$$\begin{aligned} \text{Tr}(\bar{C}' dC) &= \text{Tr}(\bar{C}' (I - UT^{-1}U')dh) \\ &\quad - \text{Tr}(\bar{C}' dUT^{-1}U'h) - \text{Tr}(\bar{C}' UT^{-1}dU'h) \\ &\quad + \text{Tr}(\bar{C}' UT^{-1}(B \circ (dU'U + U'dU))T^{-1}U'h). \end{aligned}$$

Now using the identity  $\text{Tr}(AB) = \text{Tr}(BA)$ , where the second dimension of  $A$  agrees with the first dimension of  $B$ , we can rearrange the expression of  $\text{Tr}(\bar{C}' dC)$  as follows

$$\begin{aligned} \text{Tr}(\bar{C}' dC) &= \text{Tr}(\bar{C}' (I - UT^{-1}U')dh) \\ &\quad - \text{Tr}(T^{-1}U'h\bar{C}' dU) - \text{Tr}(h\bar{C}' UT^{-1}dU') \\ &\quad + \text{Tr}(T^{-1}U'h\bar{C}' UT^{-1}(B \circ (dU'U + U'dU))). \end{aligned}$$

To simplify the expression, we will use the short notations

$$\tilde{C} = (T')^{-1}U'\bar{C},$$

$$\tilde{h} = T^{-1}U'h,$$

$\text{Tr}(\bar{C}' dC)$  becomes

$$\begin{aligned} \text{Tr}(\bar{C}' dC) &= \text{Tr}((\tilde{C}' - \tilde{C}'U')dh) \\ &\quad - \text{Tr}(\tilde{h}\tilde{C}' dU) - \text{Tr}(h\tilde{C}' dU') \\ &\quad + \text{Tr}(\tilde{h}\tilde{C}'(B \circ (dU'U + U'dU))). \end{aligned}$$

Now using the two following identities of the trace

$$\begin{aligned}\text{Tr}(A') &= \text{Tr}(A), \\ \text{Tr}(A(B \circ C)) &= \text{Tr}((A \circ B')C),\end{aligned}$$

we can rewrite  $\text{Tr}(\bar{C}' dC)$  as follows

$$\begin{aligned}\text{Tr}(\bar{C}' dC) &= \text{Tr}((\bar{C}' - \tilde{C}'U')dh) \\ &\quad - \text{Tr}(\tilde{h}\bar{C}' dU) - \text{Tr}(h\tilde{C}' dU') \\ &\quad + \text{Tr}((\tilde{h}\tilde{C}' \circ B')dU'U) \\ &\quad + \text{Tr}((\tilde{h}\tilde{C}' \circ B')U' dU).\end{aligned}$$

By rearranging and taking the transpose of the third and fourth term of the right-hand side we obtain

$$\begin{aligned}\text{Tr}(\bar{C}' dC) &= \text{Tr}((\bar{C}' - \tilde{C}'U')dh) \\ &\quad - \text{Tr}(\tilde{h}\bar{C}' dU) - \text{Tr}(\tilde{C}\tilde{h}' dU) \\ &\quad + \text{Tr}(((\tilde{C}\tilde{h}') \circ B)U' dU) \\ &\quad + \text{Tr}(((\tilde{h}\tilde{C}') \circ B')U' dU).\end{aligned}$$

Factorising by  $dU$  inside the Tr we get

$$\begin{aligned}\text{Tr}(\bar{C}' dC) &= \text{Tr}((\bar{C}' - \tilde{C}'U')dh) - \\ &\quad \text{Tr}((\tilde{h}\bar{C}' + \tilde{C}\tilde{h}' - [(\tilde{C}\tilde{h}') \circ B + (\tilde{h}\tilde{C}') \circ B'] U') dU).\end{aligned}$$

Using lemma 1 we conclude that

$$\begin{aligned}\bar{U} &= U [(\tilde{h}\tilde{C}') \circ B' + (\tilde{C}\tilde{h}') \circ B] - \bar{C}\tilde{h}' - h\tilde{C}', \\ \bar{h} &= \bar{C} - U\tilde{C}.\end{aligned}$$

□

*Sketch of the proof for Corollary 1.* For any nonzero complex valued vector  $x \in \mathbb{C}^n$ , if we chose  $u = x + e^{i\theta} \|x\| e_1$  and  $H = -e^{-i\theta} (I - 2\frac{uu^*}{\|u\|^2})$ , where  $\theta \in \mathbb{R}$  is such that  $x_1 = e^{i\theta} \|x\|$ , we have (Mezzadri, 2006)

$$Hx = \|x\|e_1 \quad (2)$$

Taking this fact into account, a similar argument to that used in the proof of Theorem 1 can be used here. □

## B. Algorithm Explanation

Let  $U := (v_{i,j})_{\substack{1 \leq j \leq m \\ 1 \leq i \leq n}}$ . Then the element of the matrix  $T := \text{striu}(U'U) + \frac{1}{2}\text{diag}(U'U)$  can be expressed as

$$t_{i,j} = \llbracket i \leq j \rrbracket \frac{\sum_{k=j}^n v_{k,i} v_{k,j}}{1 + \delta_{i,j}},$$

where  $\delta_{i,j}$  is the Kronecker delta and  $\llbracket \cdot \rrbracket$  is the Iverson bracket (i.e.  $\llbracket p \rrbracket = 1$  if  $p$  is true and  $\llbracket p \rrbracket = 0$  otherwise).

In order to compute the gradients in Equations (14) and (15). we first need to compute  $\tilde{h} = T^{-1}U'h$  and  $\tilde{C} = (T')^{-1}U'\frac{\partial \mathcal{L}}{\partial C}$ . This is equivalent to solving the triangular systems of equations  $T\tilde{h} = U'h$  and  $T'\tilde{C} = U'\frac{\partial \mathcal{L}}{\partial C}$ .

**Solving the triangular system  $T\tilde{h} = U'h$ .** For  $1 \leq k \leq m$ , we can express the  $k$ -th row of this system as

$$\begin{aligned}t_{k,k}\tilde{h}_k + \sum_{j=k+1}^m t_{k,j}\tilde{h}_j &= \sum_{j=k}^n v_{j,k}h_j, \\ &= \sum_{j=k}^n v_{j,k}h_j - \sum_{j=k+1}^m \sum_{r=j}^n v_{r,k}v_{r,j}\tilde{h}_j, \\ &= \sum_{r=k}^n v_{r,k}h_r - \sum_{r=k+1}^n v_{r,k} \sum_{j=k+1}^r v_{r,j}\tilde{h}_j, \quad (3)\end{aligned}$$

$$= U'_{*,k}(h - \sum_{j=k+1}^m U_{*,j}\tilde{h}_j), \quad (4)$$

where the passage from Equation (3) to (4) is justified because  $v_{r,j} = 0$  for  $j > r$ . Therefore,  $\sum_{j=k+1}^m v_{r,j}\tilde{h}_j = \sum_{j=k+1}^m v_{r,j}\tilde{h}_j$ .

By setting  $H_{*,k+1} := h - \sum_{j=k+1}^m U_{*,j}\tilde{h}_j$ , and noting that  $t_{k,k} = \frac{U'_{*,k}U_{*,k}}{2}$ , we get

$$\tilde{h}_k = \frac{2}{U'_{*,k}U_{*,k}}U'_{*,k}H_{*,k+1}, \quad (5)$$

$$H_{*,k} = H_{*,k+1} - \tilde{h}_kU_{*,k}. \quad (6)$$

Equations (5) and (6) explain the lines 8 and 9 in Algorithm 1. Note that  $H_{*,1} = h - \sum_{j=1}^m U_{*,j}\tilde{h}_j = h - \sum_{j=1}^m U_{*,j}[T^{-1}U'h]_j = h - UT^{-1}U'h = Wh$ . Hence, when  $h = h^{(t-1)}$ , we have  $H_{*,1} = C^{(t)}$ , which explains line 16 in Algorithm 1.

**Solving the triangular system  $T'\tilde{C} = U'\frac{\partial \mathcal{L}}{\partial C}$ .** Similarly to the previous case, we have for  $1 \leq k \leq m$

$$\begin{aligned}t_{k,k}\tilde{C}_k + \sum_{j=1}^{k-1} t_{j,k}\tilde{C}_j &= \sum_{j=k}^n v_{j,k} \left[ \frac{\partial \mathcal{L}}{\partial C} \right]_j, \\ &= \sum_{j=1}^n v_{j,k} \left[ \frac{\partial \mathcal{L}}{\partial C} \right]_j - \sum_{j=1}^{k-1} \sum_{r=k}^n v_{r,j}v_{r,k}\tilde{C}_j, \quad (7)\end{aligned}$$

$$= \sum_{r=1}^n v_{r,k} \left[ \frac{\partial \mathcal{L}}{\partial C} \right]_r - \sum_{r=1}^n v_{r,k} \sum_{j=1}^{k-1} v_{r,j}\tilde{C}_j, \quad (8)$$

$$= U'_{*,k} \left( \frac{\partial \mathcal{L}}{\partial C} - \sum_{j=1}^{k-1} U_{*,j}\tilde{C}_j \right),$$

|    | Operation                                                   | Flop count<br>for iteration $k$ | Total Flop count<br>for $m$ iteration |
|----|-------------------------------------------------------------|---------------------------------|---------------------------------------|
| FP | $\tilde{h}_k \leftarrow \frac{2}{N_k} U'_{*,k} H_{*,k+1}$   | $2(n-k) + 3$                    | $(4n - m + 2)m$                       |
|    | $H_{*,k} \leftarrow H_{*,k+1} - \tilde{h}_k U_{*,k}$        | $2n$                            |                                       |
| BP | $\tilde{h}_k \leftarrow \frac{2}{N_k} U'_{*,k} H_{*,k+1}$   | $2(n-k) + 3$                    | $(7n - 2m + 3)m$                      |
|    | $g \leftarrow g - \tilde{C}_k U_{*,k}$                      | $2(n-k+1)$                      |                                       |
|    | $G_{*,k} \leftarrow -\tilde{h}_k g - \tilde{C}_k H_{*,k+1}$ | $3n$                            |                                       |

Table 1. Time complexities of different operations in algorithm 1. It is assumed that the matrix  $U \in \mathbb{R}^{n \times m}$  is defined as in Equation (9).

where the passage from Equation (7) to (8) is justified by the fact that  $\sum_{r=k}^n v_{r,j} v_{r,k} \tilde{C}_j = \sum_{r=1}^n v_{r,j} v_{r,k} \tilde{C}_j$  (since  $v_{r,k} = 0$  for  $r < k$ ).

By setting  $g := \frac{\partial \mathcal{L}}{\partial C^{(t)}} - \sum_{j=1}^{k-1} U_{*,j} \tilde{C}_j$ , we can write  $\tilde{C}_k = \frac{2}{U'_{*,k} U_{*,k}} U'_{*,k} g$  which explains the lines 12 and 13 in Algorithm 1. Note also that after  $m$ -iterations in the backward propagation loop in Algorithm 1, we have  $g = \frac{\partial \mathcal{L}}{\partial C^{(t)}} - \sum_{j=1}^m U_{*,j} \tilde{C}_j = \frac{\partial \mathcal{L}}{\partial C^{(t)}} - U \tilde{C} = \frac{\partial \mathcal{L}}{\partial h^{(t-1)}}$ . This explains line 17 of Algorithm 1.

Finally, note that from Equation (14), we have for  $1 \leq i \leq n$  and  $1 \leq k \leq m$

$$\begin{aligned}
\left[ \frac{\partial \mathcal{L}}{\partial U} \right]_{i,k} &= - \left[ \frac{\partial \mathcal{L}}{\partial C} \right]_i \tilde{h}_k - h_i \tilde{C}_k + \\
&\quad \sum_{j=1}^m v_{i,j} \left( ((\tilde{h} \tilde{C}') \circ B')_{j,k} + ((\tilde{C} \tilde{h}') \circ B)_{j,k} \right), \\
&= - \left[ \frac{\partial \mathcal{L}}{\partial C} \right]_i \tilde{h}_k - h_i \tilde{C}_k + \\
&\quad \sum_{j=1}^m v_{i,j} \left( \tilde{h}_j \tilde{C}_k \frac{\llbracket k \leq j \rrbracket}{1 + \delta_{j,k}} + \tilde{C}_j \tilde{h}_k \frac{\llbracket j \leq k \rrbracket}{1 + \delta_{j,k}} \right), \\
&= - \left[ \frac{\partial \mathcal{L}}{\partial C} \right]_i \tilde{h}_k - h_i \tilde{C}_k + \\
&\quad \sum_{j=1}^m v_{i,j} \left( \tilde{h}_j \tilde{C}_k \llbracket k < j \rrbracket + \tilde{C}_j \tilde{h}_k \llbracket j \leq k \rrbracket \right), \\
&= \tilde{C}_k \left( \sum_{j=k+1}^m v_{i,j} \tilde{h}_j - h_i \right) \\
&\quad + \tilde{h}_k \left( \sum_{j=1}^k v_{i,j} \tilde{C}_j - \left[ \frac{\partial \mathcal{L}}{\partial C} \right]_i \right).
\end{aligned}$$

Therefore, when  $C = C^{(t)}$  and  $h = h^{(t-1)}$  we have

$$\left[ \frac{\partial \mathcal{L}}{\partial U^{(t)}} \right]_{*,k} = -\tilde{C}_k H_{*,k+1} - \tilde{h}_k g,$$

where  $g = \frac{\partial \mathcal{L}}{\partial C^{(t)}} - \sum_{j=1}^{k-1} \tilde{C}_j U_{*,j}$ . This explains lines 14 and 18 of Algorithm 1.

## C. Time complexity

Table 1 shows the flop count for different operations in the local backward and forward propagation steps in Algorithm 1.

## D. Matlab implementation of Algorithm 1

```

% Inputs: U - matrix of reflection vectors
%         h - hidden state at time-step t-1
%         BPg - Grad of loss w.r.t C=Wh
% Outputs: g, G, C=Wh
[n, m] = size(U);
G=zeros(n, m); H = zeros(n, m+1);
N = zeros(m); h_tilde = zeros(m);
% Zero-initialisation not required above!
H(:, m+1)=h; g=BPg;
%%--Forward propagation--%%
for k =0:m-1
    N(m-k) = U(:, m-k)' * U(:, m-k);
    h_tilde(m-k)=2 / N(m-k) * ...
        U(:, m-k)' * H(:, m-k+1);
    H(:, m-k)=H(:, m-k+1) - ...
        h_tilde(m-k) * U(:, m-k);
end
C = H(:, 1)
%%--Backward propagation--%%
for k=1:m
    c_tilde_k = 2*U(:, k)' * g / N(k);
    g = g - c_tilde_k * U(:, k);
    G(:, k)=-h_tilde(k) * g - ...
        c_tilde_k * H(:, k+1);
end

```

Figure 1. MATLAB code performing one-step FP and BP required to compute  $C^{(t)}$ ,  $\frac{\partial \mathcal{L}}{\partial h^{(t-1)}}$  (variable  $g$  is the code), and  $\frac{\partial \mathcal{L}}{\partial U^{(t)}}$  (variable  $G$  is the code). The required inputs for the FP and BP are, respectively, the tuples  $(U, h^{(t-1)})$  and  $(U, C^{(t)}, \frac{\partial \mathcal{L}}{\partial C^{(t)}})$ . Note that  $\frac{\partial \mathcal{L}}{\partial C^{(t)}}$  is variable  $BPg$  in the Matlab code.

## References

Giles, Mike B. An extended collection of matrix derivative results for forward and reverse mode automatic differentiation. 2008.

---

Mezzadri, Francesco. How to generate random matrices from the classical compact groups. *arXiv preprint math-ph/0609050*, 2006.
